# Supplementary material for: scDPN for High-throughput Single-cell CNV Detection to Uncover Clonal Evolution During HCC Recurrence
Source: PubMed Central journal article supplement (PMC8864190; doi:10.1016/j.gpb.2021.03.008), 2021-07-17

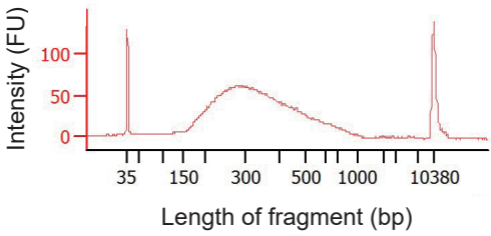

Supplement: mmc1.pdf [file mmc1.pdf]
