# Supplementary material for: scDPN for High-throughput Single-cell CNV Detection to Uncover Clonal Evolution During HCC Recurrence
Source: PubMed Central journal article supplement (PMC8864190; doi:10.1016/j.gpb.2021.03.008), 2021-07-17
Supplement: mmc4.pdf [file mmc4.pdf]

**A**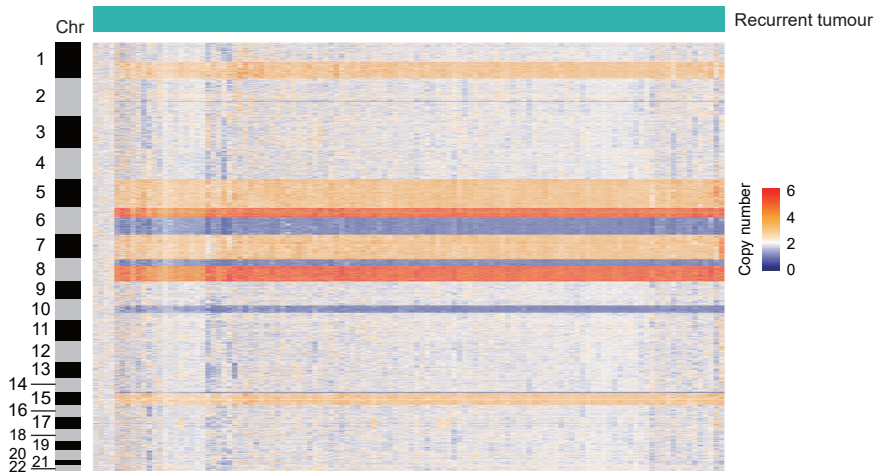**B**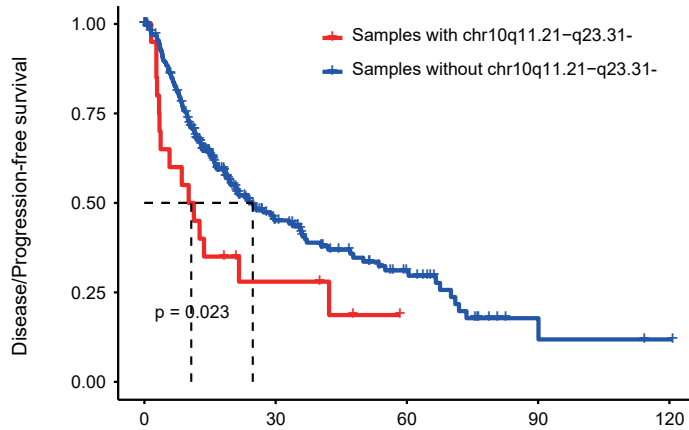

| No. at risk | Months disease/progression-free |    |    |    |     |
|-------------|---------------------------------|----|----|----|-----|
|             | 0                               | 30 | 60 | 90 | 120 |
| With Del    | 21                              | 4  | 0  | 0  | 0   |
| Without Del | 276                             | 58 | 21 | 3  | 1   |

**C**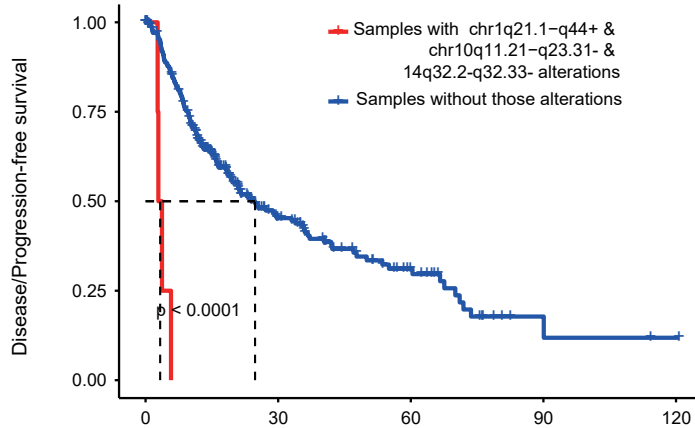

| No. at risk | Months disease/progression-free |    |    |    |     |
|-------------|---------------------------------|----|----|----|-----|
|             | 0                               | 30 | 60 | 90 | 120 |
| With Alt    | 4                               | 0  | 0  | 0  | 0   |
| Without Alt | 285                             | 62 | 21 | 3  | 1   |
